# Supplementary material
Source: publisher site journal article supplement (https://www.dovepress.com/article/164227)
Supplement: Supplementary file 1 [file get_supplementary_file.php%3Ff%3D164227.pdf]

## Supplementary materials

### **LncRNAs and *EGFRvIII* sequester in TEPs enable blood-Based NSCLC Diagnosis**

Chang-Liang Luo<sup>1#</sup>, Zhi-Gao Xu<sup>2#</sup>, Hao Chen<sup>2</sup>, Jia Ji<sup>1</sup>, Yu-Hui Wang<sup>1</sup>, Wei Hu<sup>1</sup>, Kun

Wang<sup>3</sup>, Wu-Wen Zhang<sup>1</sup>, Chun-Hui Yuan<sup>4\*</sup>, Fu-Bing Wang<sup>1\*</sup>

<sup>1</sup>Department of Laboratory Medicine, Zhongnan Hospital of Wuhan University,

Wuhan 430071, P.R. China

<sup>2</sup>Department of Pathology, Zhongnan Hospital of Wuhan University, Wuhan 430071,

P.R. China

<sup>3</sup>Department of Laboratory Medicine, Hubei Cancer Hospital, Wuhan 430079, P.R.

China

<sup>4</sup>Department of Laboratory Medicine, Wuhan Children's Hospital, Huazhong

University of Science and Technology, Wuhan 430071, P.R. China

# These authors contributed equally to this work.

\*Corresponding author: Fu-Bing Wang, Department of Laboratory Medicine,

Zhongnan Hospital of Wuhan University, No 169 Donghu Road, Wuchang District,

Wuhan 430071, P.R. China. Email address: wfb20042002@sina.com; Tel:

+86-27-67813517; Fax: +86-27-67813128; Chun-Hui Yuan, Department of

Laboratory Medicine, Wuhan Children's Hospital, Huazhong University of Science

and Technology, Wuhan 430016, P.R. China. Email address: Chun-Hui Yuan,

Chunhui.yuen@whu.edu.cn

## Supplementary Figure

### Figure S1

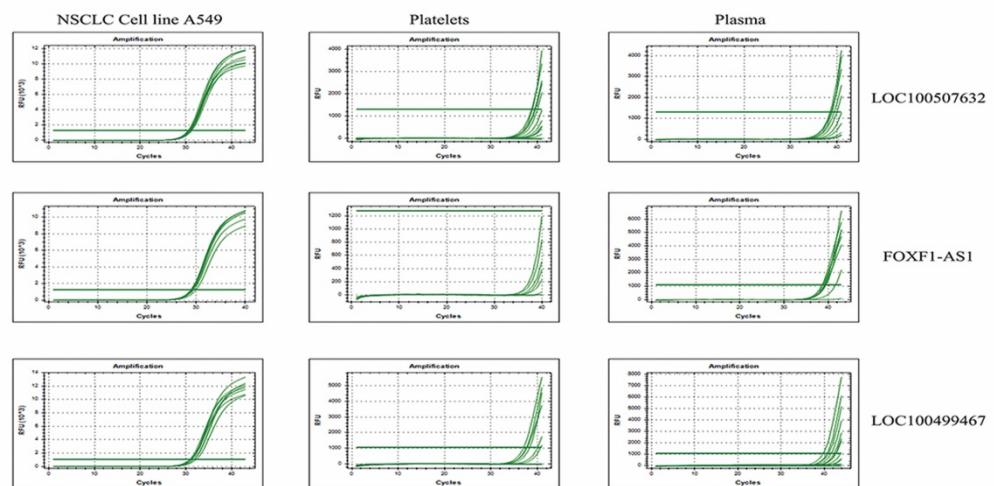

**Figure S1.** The expression of *LOC100507632*, *FOXF1-AS1* and *LOC100499467* in NSCLC platelets, plasma and NSCLC cell line A549

**Figure S2**

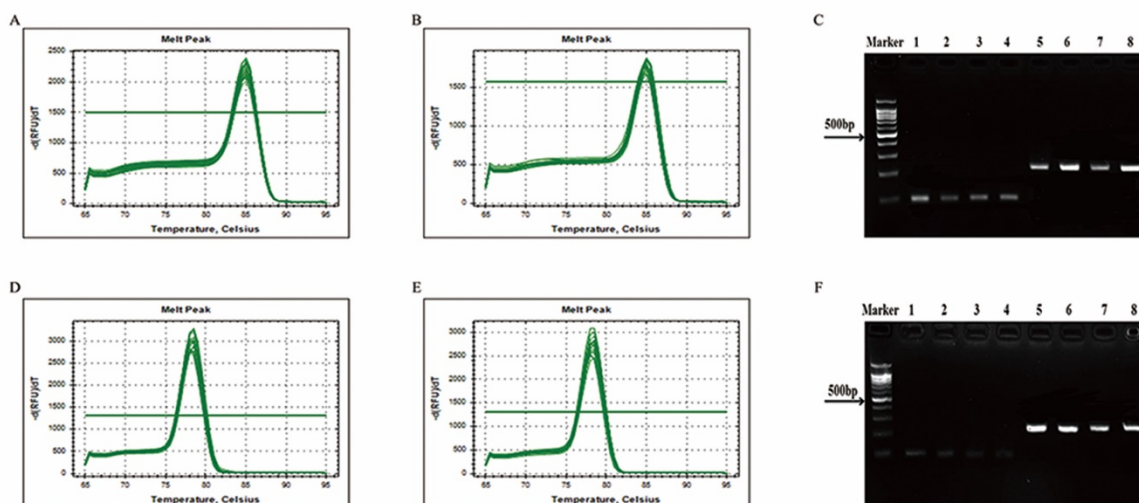

**Figure S2.**The Melt Curve and the result of agarose gel electrophoresis.

(A)The Melt Curve of *MAGI2-AS3* in platelets. (B)The Melt Curve of *MAGI2-AS3* in plasma. (C)Lane 1, 2-100 bp target gene *MAGI2-AS3* in platelets ;Lane 3, 4-100 bp target gene *MAGI2-AS3* in plasma; Lane 5, 6-221bp endogenous gene *GAPDH* in platelets; Lane 7, 8-221bp endogenous gene *GAPDH* in plasma. (D)The Melt Curve of *ZFAS1* in platelets. (E)The Melt Curve of *ZFAS1* in plasma. (F)Lane 1, 2-97 bp target gene *ZFAS1* in plasma in platelets ; Lane 3, 4-97 bp target gene *ZFAS1* in plasma; Lane 5, 6-221bp endogenous gene *GAPDH* in platelets; Lane 7, 8-221bp endogenous gene *GAPDH* in plasma.

**Figure S3**

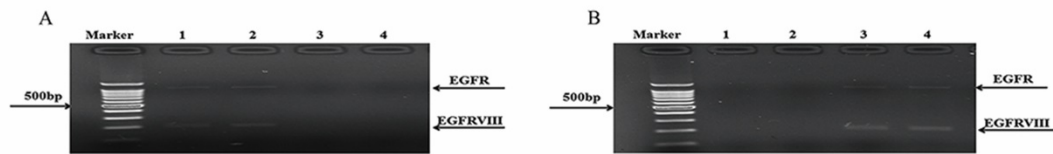

**Figure S3.** Contamination test for *EGFRvIII* (A) Mixing *EGFRVIII*-expression plasma and without *EGFRVIII*-expression platelets. Lane 1: *EGFRVIII*-expression plasma before mixing; Lane 2: *EGFRVIII*-expression plasma after mixing; Lane 3: without *EGFRVIII*-expression platelets before mixing; Lane 4: without *EGFRVIII*-expression platelets after mixing. (B) Mixing *EGFRVIII*-expression platelets and without *EGFRVIII*-expression plasma. Lane 1: without *EGFRVIII*-expression plasma before mixing; Lane 2: without *EGFRVIII*-expression plasma after mixing; Lane 3: *EGFRVIII*-expression platelets before mixing; Lane 4: *EGFRVIII*-expression platelets after mixing.

## Supplementary Table

**Table S1** List of primers used in this paper

|         | <b>Primer name</b>     | <b>Sequence (5'-3')</b> |
|---------|------------------------|-------------------------|
| RT-PCR  | EGFR(EGFR $\nu$ III)-F | CAGTATTGATCGGGAGAG      |
|         | EGFR(EGFR $\nu$ III)-R | CATCTCATAGCTGTCCGC      |
| RT-qPCR | MAGI2-AS3-F            | GAGCAGAAATAGCGGGACCT    |
|         | MAGI2-AS3-R            | TCTCTTGGATGCAAACGGCA    |
|         | LOC100507632-F         | TGGGTAACCTTCAGGTGGAGC   |
|         | LOC100507632-R         | GGTCCCAAACGCAGACCATT    |
|         | FOXF1-AS1-F            | ACAGTGGACCCTGAACAACC    |
|         | FOXF1-AS1-R            | GGGCTTTTGACGAGTAGGCT    |
|         | LOC100499467-F         | TCAGAAGACCCACGACCTCT    |
|         | LOC100499467-R         | AATACCTCCAGCTTGGCGAC    |
|         | ZFAS1-F                | ACGTGCAGACATCTACAACCT   |
|         | ZFAS1-R                | TACTTCCAACACCCGCAT      |
| GAPDH-F | GGTCTCCTCTGACTTCAACA   |                         |
| GAPDH-R | GTGAGGGTCTCTCTTCTTCT   |                         |

**TableS2** AUC of the expression of MAGI2-AS3 and ZFAS1 in the all subgroups

| Group                        | Adenocarcinoma vs controls |              |          |       |        | squamous cell carcinoma vs controls |              |         |       |        |
|------------------------------|----------------------------|--------------|----------|-------|--------|-------------------------------------|--------------|---------|-------|--------|
|                              | AUC                        | 95% CI       | P value  | Se(%) | Sp (%) | AUC                                 | 95% CI       | P value | Se(%) | Sp (%) |
| Platelets MAGI2-AS3          | 0.853                      | 0.789- 0.918 | <0.0001  | 77.9  | 81.7   | 0.892                               | 0.819- 0.965 | <0.0001 | 78.7  | 88.3   |
| Plasma MAGI2-AS3             | 0.866                      | 0.802-0.929  | <0.0001  | 82.4  | 85     | 0.887                               | 0.813- 0.961 | <0.0001 | 90.9  | 85     |
| Platelets ZFAS1              | 0.780                      | 0.701–0.858  | <0.0001  | 75.0  | 66.7   | 0.744                               | 0.641- 0.848 | <0.0001 | 93.9  | 43.3   |
| plasma ZFAS1                 | 0.806                      | 0.731- 0.881 | <0.0001  | 75.0  | 73.3   | 0.770                               | 0.663- 0.878 | <0.0001 | 66.7  | 80.0   |
| Platelet MAGI2-AS3 and ZFAS1 | 0.908                      | 0.853- 0.963 | <0.0001  | 89.7  | 86.7   | 0.919                               | 0.848- 0.990 | <0.0001 | 81.8  | 96.7   |
| PlasmaMAGI2-AS3 and ZFAS1    | 0.890                      | 0.834- 0.946 | < 0.0001 | 76.5  | 86.7   | 0.902                               | 0.833-0.972  | <0.0001 | 84.9  | 88.3   |

**TableS3** The result of EGFR mutation in plasma and blood platelets

| Test No | Gender | Age | TNM    | clear diagnosis in tissue | result in plasma | result in platelets |
|---------|--------|-----|--------|---------------------------|------------------|---------------------|
| 1       | male   | 56  | T4N3M1 | G719X                     | -                | -                   |
| 2       | male   | 49  | T4N3M1 | L858R                     | -                | -                   |
| 3       | male   | 37  | T3N2M1 | L858R                     | -                | -                   |
| 4       | male   | 62  | T4N3M1 | L858R                     | -                | -                   |
| 5       | male   | 52  | T2N2M1 | 19-Del                    | -                | -                   |
| 6       | female | 63  | T3N2M1 | L858R                     | L858R            | -                   |
| 7       | male   | 59  | T4N0M1 | L858R                     | -                | -                   |
| 8       | male   | 48  | T3N2M1 | L858R                     | -                | -                   |
| 9       | male   | 58  | T2N3M0 | L858R                     | -                | -                   |
| 10      | male   | 51  | T4N3M1 | L858R                     | -                | -                   |
| 11      | male   | 62  | T3N2M1 | 19-Del                    | 19-Del           | -                   |
| 12      | male   | 59  | T4N3M1 | 19-Del                    | 19-Del           | -                   |
| 13      | male   | 43  | T3N2M1 | 19-Del+L858R              | -                | -                   |
| 14      | male   | 51  | T4N0M1 | 19-Del                    | -                | -                   |
